# Supplementary material for: Which rules to follow? how differences in renewable fuel standards obscure the potential climate impact of transportation fuels
Source: Frontiers journal article supplement (doi:10.3389/fenrg.2024.1490137), 2024-11-07
Supplement: Data_Sheet_1.PDF [file Data_Sheet_1.PDF]

## Supplementary Material

### 1 Indirect land use change values

Table 1 below presents the iLUC values shown in Figure 1 in the main text, along with the sources from where they were obtained.

**Table 1. Indirect land use change values used in the fuel standards**

|                      | iLUC value (gCO <sub>2e</sub> /MJ fuel) |                                            |                                         |
|----------------------|-----------------------------------------|--------------------------------------------|-----------------------------------------|
|                      | Rapeseed biodiesel                      | Soybean biodiesel                          | Sugarcane ethanol                       |
| RED (EC, 2018)       | 33 (low)<br>55 (mean)<br>66 (high)      | 33 (low)<br>55 (mean)<br>66 (high)         | 4 (low)<br>13 (mean)<br>17 (high)       |
| RTFO (UKDfT, 2024a)  | 55                                      | 55                                         | 13                                      |
| LCFS (CARB, 2014)    | 19.4                                    | 29.1                                       | 11.8                                    |
| RFS (USEPA, 2023a)   | 11 (low)<br>35.8 (mean)<br>67.3 (high)  | 6 (low)<br>35.5 (mean)<br>71.1 (high)      | -4.2 (low)<br>5.6 (mean)<br>14.1 (high) |
| CORSIA (ICAO, 2022a) | 24.1 (Europe)<br>26 (global)            | 24.5 (USA)<br>27 (Brazil)<br>25.8 (global) | 7.3 (Brazil)<br>9.1 (global)            |

### 2 Fuel carbon intensity scores

#### 2.1 Data sources for default values

For the RED, RTFO and CORSIA, default values for the carbon intensity (CI) of the fuel pathways are provided in the fuel standards documents and appendices (EC, 2018; ICAO, 2022b; UKDfT, 2024a).

For the LCFS, the CI scores come from pathways and fuel production sites that have been approved by the California Air Resources Board (CARB), meaning that there can be multiple approved values for the same fuel and pathway (CARB, 2023). In these instances, the average of the values was taken and used for this study.

The RFS provides default values for pathways that have been approved by the US Environmental Protection Agency (USEPA, 2023a), as well as pathways that have been approved due to their similarity to other pathways (USEPA, 2023b). These sources were used for the default values in this study.

#### 2.2 Method for calculation of scores

For RED and RTFO, calculation guidelines are detailed in the fuel standard documentation. These guidelines were followed to calculate the CI scores for e-hydrogen produced via renewable and grid electricity according to these rules.

The formula for calculating the CI of a fuel according to the RED and RTFO is:

|                                                                       |       |
|-----------------------------------------------------------------------|-------|
| $E = e_{ec} + e_l + e_p + e_{td} + e_u - e_{sca} - e_{ccs} - e_{ccr}$ | Eq. 1 |
|-----------------------------------------------------------------------|-------|

Where:

|             |                                                                                                                           |
|-------------|---------------------------------------------------------------------------------------------------------------------------|
| $E =$       | The total emissions from the use of the fuel (i.e. the CI score)                                                          |
| $e_{ec} =$  | The emissions from the extraction/cultivation of raw materials (e.g. fertilizer, diesel for harvesting, etc.)             |
| $e_l =$     | The emissions as a result of land use changes                                                                             |
| $e_p =$     | The emissions from fuel processing (e.g. electricity, heat, chemicals, etc.)                                              |
| $e_{td} =$  | The emissions from transporting the fuel and/or raw materials                                                             |
| $e_u =$     | The emissions from combustion of the fuel                                                                                 |
| $e_{sca} =$ | Emission savings from soil carbon accumulation due to improved agricultural practices                                     |
| $e_{ccs} =$ | Emission savings from capture and permanent storage of CO <sub>2</sub>                                                    |
| $e_{ccr} =$ | Emission savings from capture of biogenic CO <sub>2</sub> to replace fossil CO <sub>2</sub> in other production processes |

For e-hydrogen, where no cultivation, land use changes, soil improvement, or carbon capture and storage/recycling is involved, and that emissions from the combustion of the fuel are considered zero (EC, 2023; UKDfT, 2024b), the relevant parameters in Equation 1 are  $e_p$  and  $e_{td}$ . In Table 2, the parameters included for e-hydrogen production and their corresponding emission factors are shown. For the calculations, a basis of 1 kg hydrogen was used, and the lower heating value of hydrogen was taken as 120 MJ/kg.

**Table 2. Parameters and emission factors used for the calculation of e-hydrogen**

| Parameter           | Amount                        | E <sub>f</sub> (RED)                                                        | E <sub>f</sub> (RTFO)                                                                                      |
|---------------------|-------------------------------|-----------------------------------------------------------------------------|------------------------------------------------------------------------------------------------------------|
| Transport, pipeline | 100 km                        | 0.087 kgCO <sub>2</sub> e/t-km                                              | 0 kgCO <sub>2</sub> e/t-km                                                                                 |
| Electricity         | 55 kWh/kg <sub>hydrogen</sub> | Renewable: 0 kgCO <sub>2</sub> e/kWh<br>Grid: 0.383 kgCO <sub>2</sub> e/kWh | Renewable: 0 kgCO <sub>2</sub> e/kWh<br>Grid: 136 kgCO <sub>2</sub> /MJ<br>(0.490 kgCO <sub>2</sub> e/kWh) |

|                       |                             |                                |                                |
|-----------------------|-----------------------------|--------------------------------|--------------------------------|
| Water,<br>desalinated | 9 kg/kg <sub>hydrogen</sub> | 0.00574 kgCO <sub>2</sub> e/kg | 0.00574 kgCO <sub>2</sub> e/kg |
|-----------------------|-----------------------------|--------------------------------|--------------------------------|

### 3 References

CARB, 2023. Current Fuel Pathways.

CARB, 2014. Detailed Analysis for Indirect Land Use Change.

EC, 2023. COMMISSION DELEGATED REGULATION (EU) 2023/1184 of 10 February 2023.

EC, 2018. DIRECTIVE (EU) 2018/2001 OF THE EUROPEAN PARLIAMENT AND OF THE COUNCIL of 11 December 2018 on the promotion of the use of energy from renewable sources.

ICAO, 2022a. CORSIA Methodology For Calculating Actual Life Cycle Emissions Values.

ICAO, 2022b. CORSIA SUPPORTING DOCUMENT CORSIA Eligible Fuels-Life Cycle Assessment Methodology.

UKDfT, 2024a. Renewable Transport Fuel Obligation: Compliance Guidance.

UKDfT, 2024b. RTFO Guidance for Renewable Fuels of Non-Biological Origin.

USEPA, 2023a. Lifecycle Greenhouse Gas Results [WWW Document]. URL <https://www.epa.gov/fuels-registration-reporting-and-compliance-help/lifecycle-greenhouse-gas-results>

USEPA, 2023b. Overview of the Renewable Fuel Standard Program [WWW Document]. URL <https://www.epa.gov/renewable-fuel-standard-program/overview-renewable-fuel-standard-program>
